# Supplementary material
Source: PubMed Central journal article supplement (PMC3635657)
Supplement: bj4520057add.pdf [file bj4520057add.pdf]

## SUPPLEMENTARY ONLINE DATA

# Characterization of a pre-export enzyme–chaperone complex on the twin-arginine transport pathway

Jennifer M. DOW\*, Frank GABEL†, Frank SARGENT\*<sup>1</sup> and Tracy PALMER\*<sup>1</sup>

\*Division of Molecular Microbiology, College of Life Sciences, University of Dundee, Dundee DD1 5EH, U.K., and †Institut de Biologie Structurale, Commissariat à l’Energie Atomique, CNRS, Université Joseph Fourier, 41 rue Jules Horowitz, 38027 Grenoble, France

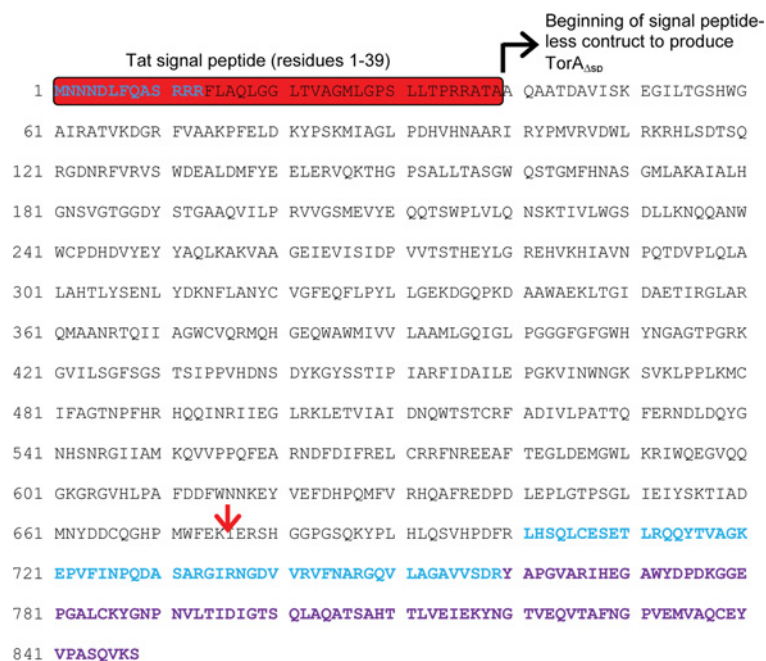

**Figure S1** The *E. coli* TorA precursor primary sequence

The points of natural proteolysis, and deliberate truncation, of the TorA precursor are highlighted. The 39-residue N-terminal twin-arginine signal peptide is highlighted in red. The position of the engineered initiation site for the construct expressing the signal-less TorA protein is indicated by the black arrow. The location of the experimentally determined trypsin-cleavage site for TorA within the TorA–TorD<sup>His</sup> complex is indicated by the red arrow. This is also the point of truncation for the TorA<sub>ΔCT</sub> protein. A small fraction of the TorA sample is subject to degradation during the purification procedure. Following IMAC, a small fraction of TorA is found to be degraded from the C-terminus and loses the purple-coloured stretch of polypeptide. Following the subsequent SEC step, a small fraction of TorA within the TorA–TorD<sup>His</sup> complex becomes proteolysed at the N-terminus and further at the C-terminus (blue). This shows that the extremities of TorA are not shielded or protected by the tightly bound TorD<sup>His</sup> protein, are exposed to solvent and are therefore susceptible to proteolysis.

<sup>1</sup> Correspondence may be addressed to either of these authors (email f.sargent@dundee.ac.uk or t.palmer@dundee.ac.uk).

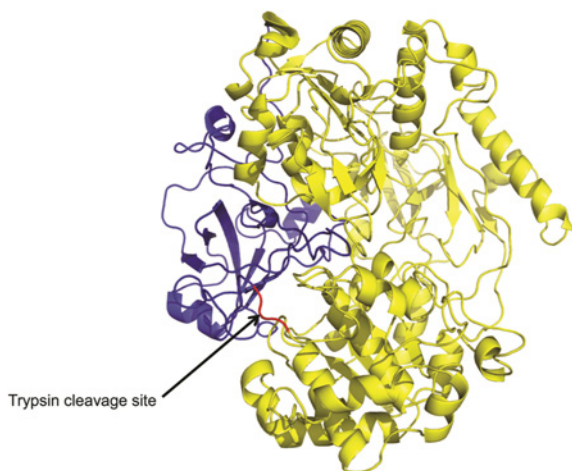

**Figure S2 X-ray structure of *S. massilia* TorA**

The C-terminal Domain IV is shaded in blue and the approximate position of the trypsin-cleavage site determined for *E. coli* TorA in the TorA–TorD<sup>His</sup> and TorA<sub>ΔSP</sub>–TorD<sup>His</sup> complexes is indicated. The image was created using PyMOL (<http://www.pymol.org>) with PDB code 1TMO.

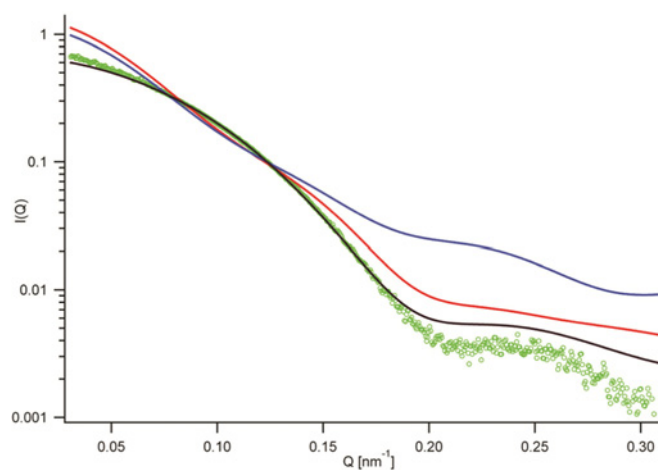

**Figure S3 Comparison of SAXS scattering curves**

Theoretical curves were calculated from *S. massilia* TorD (PDB code 1N1C) monomer (blue line) and dimer (red line) and *E. coli* DmsD (PDB code 3CW0) monomer (black line) using CRYSOLE and compared with experimental scattering curves of TorD<sup>His</sup> (green dots).

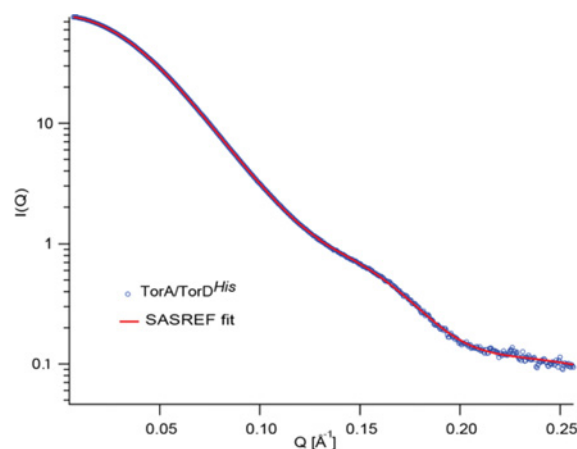

**Figure S4 SAXS scattering curve of the TorA–TorD<sup>His</sup> complex**

Fitted curve of TorA<sup>His</sup> rigid body modelling conducted using the TorA structure (PDB code 1TMO) (split into two components: Domains I–III and Domain IV) and the DmsD structure (PDB code 3CW0), performed using SASREF. The fitted curve is shown in comparison with the *E. coli* TorA<sup>His</sup> scattering curve.

**Table S1 TMAO reductase activity in strains producing variants of TorA**

Crude cell extracts were prepared from anaerobically grown cells before TMAO-dependent Benzyl Viologen-oxidation assays were performed. Results are means ± S.D. of three measurements.

| Strain and plasmid                                                            | Complex produced                         | TMAO reductase activity (μmol of Benzyl Viologen oxidized/min per mg of protein) |
|-------------------------------------------------------------------------------|------------------------------------------|----------------------------------------------------------------------------------|
| GB426 ( <i>tor</i> <sup>-</sup> , <i>dms</i> <sup>-</sup> ) + pQE80 (control) | –                                        | 0.15 ± 0.01                                                                      |
| GB426 + pQE80TorADHis                                                         | TorA/TorD <sup>His</sup>                 | 28.8 ± 4.0                                                                       |
| GB426 + pQE80TorAdeISSDHis                                                    | TorA <sub>ΔSP</sub> /TorD <sup>His</sup> | 14.8 ± 1.6                                                                       |
| GB426 + pQE80TorAtruncDhis                                                    | TorA <sub>ΔCT</sub> /TorD <sup>His</sup> | 0.12 ± 0.01                                                                      |

**Table S2 Characterization of the TorA and TorD proteins by CD**

Proportions of secondary-structural elements were calculated from CD analysis for each of the indicated samples.

| Protein                                                            | Total helix (%) | Total strand (%) | Turns (%) | Unordered (%) |
|--------------------------------------------------------------------|-----------------|------------------|-----------|---------------|
| TorA <sup>His</sup> (experimental)                                 | 26              | 25               | 20        | 29            |
| TorD <sup>His</sup> (experimental)                                 | 56              | 7                | 17        | 20            |
| TorA <sup>His</sup> and TorD <sup>His</sup> combined (theoretical) | 31              | 22               | 19        | 27            |
| TorA–TorD <sup>His</sup> (experimental)                            | 28              | 22               | 22        | 29            |
| TorA <sub>ΔSP</sub> –TorD <sup>His</sup> (experimental)            | 20              | 29               | 22        | 30            |

Received 7 December 2012/5 February 2013; accepted 1 March 2013  
 Published as BJ Immediate Publication 1 March 2013, doi:10.1042/BJ20121832
